# Supplementary material
Source: publisher figshare collection journal article supplement (https://gsajournals.figshare.com/ndownloader/files/14890892)
Supplement: Supplementary file 1 [file 14890892]

## Sheet: Father UP genes
Gene	Fold Change (LPD/CD)	FDR
Mest	29.3164	4.04796e-49
Pdk4	3.83703	1.29246e-33
Sfrp5	7.55789	2.9186e-24
Peg3	6.48263	4.54875e-23
Rasd1	3.94367	5.90805e-21
Serpine1	7.2187	9.31226e-19
Plin5	6.1506	3.9034e-18
Mmp12	10.0345	4.31722e-18
Fabp3	3.01347	4.10825e-17
Adcy5	3.65986	3.2658e-16
Zim1	8.9569	4.29115e-15
Vnn1	5.28846	6.27339e-13
Pmepa1	3.84119	1.4426e-11
Arhgef37	3.64573	7.86099e-11
Crtac1	2.87019	2.19235e-10
Slc25a20	2.06494	2.53e-10
Thbs1	2.77805	8.55568e-10
Cacna1e	2.16957	9.0493e-10
Jun	1.85254	9.39407e-10
Gk	2.60055	1.66862e-09
Abcg1	2.02924	1.74271e-09
Acad11	1.81756	4.77244e-09
Ctcflos	2.42021	9.77975e-09
Fgf10	1.94909	1.60109e-08
Prelp	2.2657	2.34426e-08
Adra1a	2.49018	3.13194e-08
Vwa8	1.62993	3.13832e-08
Trp53inp2	2.76325	3.34452e-08
Cox7a1	2.80617	4.34559e-08
Deptor	1.60426	4.34559e-08
Prr32	2.56522	4.34559e-08
Slc27a2	3.97927	4.34559e-08
Lrg1	2.11819	4.4223e-08
Lbp	2.28676	9.11986e-08
Sez6l	12.6111	1.0096e-07
Ffar2	2.68944	1.20229e-07
Gtf2ird1	1.94132	1.45081e-07
A530053G22Rik	2.11983	2.11893e-07
Elovl3	6.4879	2.27979e-07
Cidea	3.06792	2.39788e-07
Angptl4	1.96343	2.7557e-07
Acadm	1.52997	3.02157e-07
Synpo2	2.02012	3.70959e-07
Slc4a1	8.875	4.14673e-07
Gpr156	6.09375	4.73503e-07
Krt79	5.06931	4.73503e-07
Hmgcs1	2.74842	4.80403e-07
Ech1	1.54125	7.86224e-07
Apoc1	1.73439	9.46311e-07
Cpt1b	3.08043	1.03689e-06
Fam20c	2.5462	1.08462e-06
Cdkn1a	2.27697	1.23682e-06
Sesn2	2.36371	1.8274e-06
Otop1	3.87371	2.36972e-06
Fos	2.6411	2.47035e-06
Etfdh	1.58586	2.91157e-06
Hadhb	1.76316	2.92609e-06
Sod3	1.90129	3.78648e-06
Emp1	2.1031	4.3277e-06
Nap1l1	1.76477	4.69193e-06
Palld	2.15143	4.83314e-06
Srpx2	1.95962	4.91548e-06
Itih5	1.81312	6.08413e-06
Lhfpl2	2.23382	7.38206e-06
G0s2	1.98865	8.27838e-06
Pkp2	1.93913	8.27838e-06
Slc16a1	1.833	9.00378e-06
Slc25a34	4.14865	9.58644e-06
Slc25a42	1.68532	1.5647e-05
Ppara	2.18793	1.83953e-05
Slc6a13	2.69907	2.29726e-05
Cyr61	1.80648	2.45918e-05
Olfr734	5.34091	2.56346e-05
Abat	2.57033	2.80685e-05
Hacl1	1.71928	3.16355e-05
Htra3	2.10539	3.44977e-05
Lamb3	3.02687	4.41898e-05
Sparc	1.92862	4.85089e-05
Acadl	1.54929	5.09879e-05
Cd59a	1.76009	5.57556e-05
Pltp	1.76509	5.9256e-05
Tmed5	1.50577	6.82321e-05
Hilpda	2.77714	7.54693e-05
Prps1	2.04033	7.66231e-05
Cebpb	1.625	7.77526e-05
Acaa2	1.73801	7.85513e-05
Pck1	1.74687	7.85513e-05
Acsl5	1.62277	8.66822e-05
Fbxo27	2.87838	0.000103877
Hsdl2	1.47457	0.000105222
Map1a	2.0471	0.000105222
Zfyve28	2.95652	0.000105222
Hmgcs2	3.00594	0.000108846
Mecr	1.63418	0.00011124
Dusp9	7.74359	0.000113579
Cox8b	2.24766	0.000120263
Adam12	2.50498	0.000129154
Adtrp	2.08494	0.000137365
Nek6	1.97353	0.000141961
Idh3a	1.41455	0.000153892
Dhrs3	1.69266	0.000160721
Gnal	2.02132	0.000206598
Hsd17b4	1.49645	0.000206598
Tnfrsf12a	3.08727	0.000206598
Unc79	4.94805	0.000206598
Dsp	10.2143	0.000255638
Anxa2	1.54477	0.000257669
Cyp4v3	1.55725	0.000257669
Anxa6	1.52506	0.000332627
Slc4a4	1.4851	0.000350722
Acvr1b	1.6319	0.00035606
Hsp90aa1	1.4345	0.000360462
Ptpru	2.06704	0.000378181
Tusc5	1.70802	0.000386676
Kcnj14	3.05674	0.000410644
Hadha	1.55127	0.000436674
Dusp10	1.63066	0.000452832
Adipor2	1.51642	0.000483333
Tob2	1.44364	0.000556628
D430019H16Rik	2.31163	0.000575665
Bank1	1.42359	0.000623371
Sh3pxd2a	1.6679	0.00066604
Akap1	1.54898	0.000751756
Slc8a1	1.73713	0.000782383
Cdkl4	4.875	0.000790617
Btg2	1.49315	0.000835072
Phospho1	2.53922	0.000835072
Decr1	1.3824	0.000845421
Cpt1a	1.6312	0.000912065
Ucp1	7.14996	0.000912065
Ptrf	1.57099	0.000940858
Dusp3	1.55686	0.000974582
Gm26917	1.46221	0.00104393
Dhrs7b	1.54021	0.00108282
Il1rn	6.47826	0.00113497
Lox	1.84229	0.00113818
Paqr9	1.68632	0.00124989
Wwtr1	1.52996	0.00130092
Slc25a25	1.88053	0.00130253
Abcc3	1.72737	0.00142243
Sept9	1.40498	0.00149938
Sh3bgrl2	1.94673	0.00154344
Aqp7	1.6872	0.00166128
Ltbp3	1.55031	0.0017199
Irak2	1.60018	0.00184065
Dusp8	1.88413	0.00201622
Enc1	1.73823	0.0021071
Cd5l	3.80702	0.00217351
Mfge8	1.54218	0.00230425
Susd1	1.65377	0.00249542
Map1lc3a	1.53353	0.00251942
Rarres2	1.56644	0.00251942
Retsat	1.41237	0.00253119
Slfn4	4.43902	0.00253652
Tsc22d2	1.42306	0.0025507
Mrc2	1.63738	0.00272909
Sucla2	1.46075	0.00272909
Dock8	1.46139	0.00278865
Mpp7	1.7512	0.00283988
Fbln5	1.8186	0.00324926
Gcnt2	1.96659	0.0033047
Ric3	1.68943	0.0033047
Hbb-bt	1.7291	0.00334529
Pxdc1	1.52878	0.0034209
App	1.48503	0.00342819
Klf14	2.0942	0.00360393
Zfp959	2.05594	0.00416755
Smad6	1.70186	0.0042514
Cpn2	2.30045	0.00436649
Dst	1.4969	0.00442502
Ncan	1.8582	0.00464661
Ccl7	3.15556	0.00468498
Hr	1.82958	0.00512914
1700047G03Rik	2.98291	0.00526103
Clic4	1.53728	0.0054237
Acox1	1.41944	0.00550253
Lmo1	2.61194	0.00550253
Gadd45g	2.0276	0.00573846
Atf3	2.3642	0.00582751
Sipa1l1	1.48409	0.00599795
Gm44956	2.87273	0.00617832
Lctl	1.60773	0.00617832
Ldlrad4	1.61842	0.00639135
Acadvl	1.52104	0.00639412
Socs3	1.88927	0.00645458
Itga1	1.42006	0.00661634
H2-Ob	1.44064	0.00681002
Prkar2b	1.41662	0.00694321
Ogdh	1.30555	0.00737158
Ccdc77	1.6755	0.00759477
Vldlr	1.38491	0.00793715
Gatsl3	1.76889	0.00809855
Mcam	1.60788	0.00904437
Cystm1	1.8575	0.00906171
Hebp2	2.0386	0.00963404
Dhrs9	2.36095	0.0100036
Atp9a	1.53486	0.0102814
Spry4	2.04419	0.0103651
Ehhadh	1.47723	0.0104224
Mttp	1.81267	0.0124618
Fstl3	2.73832	0.0133874
Smpdl3a	1.41021	0.0134502
Cpt2	1.31775	0.013963
Letmd1	1.51158	0.014155
Bgn	1.39306	0.0144766
Tcerg1l	3.92683	0.0145755
Fbp2	2.40458	0.014816
Idh3g	1.33114	0.0148255
Sptbn1	1.40914	0.015893
Mycbp2	1.35321	0.0162577
Rasgef1b	1.51154	0.0163801
Hspg2	1.4832	0.0166612
Fam124a	1.54987	0.0167314
Suclg1	1.41109	0.0169142
Cdkl5	1.6208	0.0170941
Xpnpep3	1.43255	0.0172677
Lrrc58	1.47082	0.017774
Bcl2l13	1.38459	0.0178293
Pm20d1	2.16142	0.0178293
Clstn3	1.61154	0.0180386
Tlr1	1.48356	0.0185535
Sell	1.33225	0.0188076
Pxdn	1.40097	0.019566
Pla2g7	1.5056	0.0205976
Prune1	1.51546	0.0219255
Pdlim7	1.5707	0.0221235
Adamts6	1.62832	0.0221829
Aspg	2.25253	0.0223081
Gstm4	1.57542	0.0225862
Noct	1.798	0.0226027
Cmtm4	1.36556	0.0237662
Adat1	1.7942	0.0246387
Gpx1	1.32124	0.0247695
Rab9b	3.34	0.0247695
Kbtbd13	2.82895	0.025583
Zdhhc2	1.53486	0.025859
Mal2	1.81818	0.0263721
Tnc	1.6252	0.0273155
Chst11	1.51822	0.0277991
Rasl12	1.72318	0.0283227
Fam126b	1.39473	0.0305627
G6pdx	1.35262	0.0306604
Arxes1	1.60077	0.0311603
Gypa	6.3125	0.0311603
Lars2	1.45316	0.0328996
Eci1	1.32594	0.0342769
Hcar2	1.5626	0.0349708
Cd79b	1.34981	0.0353913
Clock	1.39518	0.0353913
Nlrp1b	1.76101	0.037309
Adcy3	1.34757	0.0376153
Stk17b	1.34276	0.0378948
Rmdn3	1.49121	0.0390466
Plin4	1.53929	0.0394869
Pcyox1	1.30812	0.0404021
Acvr1	1.41365	0.0407185
Sdsl	1.92116	0.0410193
Gabrr2	3.33333	0.0426899
Dram1	1.43291	0.0427896
Acot11	2.7013	0.0431133
Tbkbp1	1.42109	0.0441121
Ghitm	1.26024	0.0462487
Gas2	1.892	0.0469179
Vkorc1l1	1.34689	0.0470045
Mthfr	1.44094	0.0470747
Snhg14	2.83099	0.0483257
Pfkl	1.34144	0.0487115
Spred3	1.94222	0.0487115
Ppp1r3d	1.58545	0.0489374

## Sheet: Father DOWN genes
Gene	Fold Change (LPD/CD)	FDR
Myh7	-60.5455	3.53777e-60
Myh1	-5.90865	4.26619e-49
Cyp2f2	-5.95063	7.34821e-30
Myh2	-15.2952	5.05429e-29
Gm21320	-4.25591	8.04969e-21
Cited2	-2.65657	1.39182e-18
Actn2	-5.68601	4.00644e-17
Mb	-6.1875	4.14751e-16
Mup19	-5.57937	8.93968e-16
Mybpc1	-5.06358	2.58624e-15
Errfi1	-2.15865	7.08165e-12
Gsta3	-2.91516	4.68713e-11
Trabd2b	-2.18392	1.39143e-10
Cyp2e1	-3.01738	6.98133e-10
Slc25a10	-1.97186	8.41415e-10
Gbp11	-3.20984	1.70677e-09
Tcap	-3.89449	1.85766e-09
Cfd	-1.84294	2.67882e-09
Alb	-2.28295	3.38647e-09
3425401B19Rik	-2.98815	9.77975e-09
Trhde	-2.30377	1.19639e-08
Lmod2	-5.64286	1.71364e-08
Pmp22	-1.86943	1.88803e-08
Thbd	-1.89028	3.45284e-08
Mypn	-2.83083	4.01504e-08
Myot	-3.53163	4.78276e-08
Trdn	-2.5811	4.78276e-08
Gpt	-1.77375	5.22182e-08
Ripk4	-3.93	8.37303e-08
Fam107a	-2.63799	8.6269e-08
Ttn	-2.51785	8.6269e-08
Myoz2	-10.0455	1.18377e-07
Neb	-2.56925	1.68419e-07
Tpm2	-2.5715	2.32906e-07
Cdo1	-1.81812	2.66194e-07
Adcyap1r1	-2.78344	2.74543e-07
Obscn	-2.6048	3.80361e-07
Ank3	-2.01821	3.96778e-07
Apobec2	-2.40785	4.51557e-07
Zfp185	-1.95481	6.20525e-07
Atp2a1	-2.79545	6.2816e-07
Rgs3	-1.79449	7.29271e-07
Acta1	-2.1086	7.46088e-07
Cdkn2c	-1.67425	1.03637e-06
Ptges	-1.73064	1.086e-06
Retn	-1.77415	1.16597e-06
Tst	-2.0239	1.8274e-06
Irf7	-1.72072	2.91157e-06
Ifit3	-1.96563	2.92609e-06
A530016L24Rik	-1.76072	2.97447e-06
Csrp3	-4.44615	3.07667e-06
Flnc	-1.99041	3.09593e-06
Fam46a	-1.70816	4.29889e-06
Hspb7	-3.181	4.62953e-06
Nrap	-3.5	5.22325e-06
Alpk3	-2.72822	6.03981e-06
Tnnt3	-2.40392	6.03981e-06
Mup11	-7.27586	7.00189e-06
Aldh1l1	-1.7018	7.49407e-06
Cdsn	-1.59459	7.77755e-06
Itgb4	-1.84965	8.13e-06
Myom1	-2.09586	9.7688e-06
Slc16a9	-1.98192	1.02418e-05
Abca8a	-1.58935	1.23951e-05
Slc2a13	-1.70662	1.42313e-05
Pygb	-1.55529	1.46193e-05
Mylk2	-3.05882	2.12537e-05
Synpo2l	-3.45455	2.17794e-05
Cish	-1.98454	2.51225e-05
Ppp1r1a	-1.811	2.94104e-05
Smim1	-1.80202	3.10114e-05
Myh11	-1.59217	3.44852e-05
Ckmt2	-2.97863	3.44977e-05
Pcbp4	-1.76424	3.44977e-05
Tmem179	-1.66685	3.44977e-05
Bcat2	-1.67225	3.72945e-05
Pon1	-2.19484	3.78245e-05
Ryr1	-2.49405	5.01525e-05
Ogn	-1.5589	6.52415e-05
Agt	-1.94424	7.47495e-05
Abi3bp	-1.5602	8.66822e-05
Cox6a2	-3.84211	8.78984e-05
Gpc3	-1.83951	9.4264e-05
Drp2	-1.8087	9.42992e-05
Irf4	-1.60301	9.59603e-05
Dcn	-1.58861	0.000103877
Pcx	-1.49767	0.000109237
Igfbp6	-1.58736	0.000150535
Fads1	-1.60759	0.0001518
Mmrn1	-2.2	0.000157502
Scn4b	-2.28523	0.000222762
Agbl1	-6.34615	0.000236566
Cacna1s	-2.20868	0.000278697
Car3	-1.37659	0.000315282
Rbp4	-1.54639	0.000351113
Foxred2	-1.69103	0.00035606
Mpz	-1.70509	0.000385012
Rpl3l	-2.35319	0.000386676
Akap6	-2.16092	0.000405178
Ppp1r27	-6.21739	0.000410644
Prrt4	-3.0198	0.000410644
Nid2	-1.46812	0.00046793
C3	-1.54838	0.000483333
Hrc	-2.4463	0.000483333
Xirp2	-2.37948	0.000483333
Slc6a6	-1.5541	0.000510242
Slc38a3	-3.43056	0.000521853
Stmn4	-3.93878	0.000526085
Ace	-1.53192	0.000533876
Lpin1	-1.46884	0.000568286
Pdgfc	-1.5994	0.000574613
Gm42517	-4.10417	0.000578906
Myo18b	-2.14589	0.000583754
Car5b	-1.56963	0.000594543
Cmya5	-2.01251	0.000636088
Myoz1	-2.1978	0.00066604
Prodh	-2.04078	0.000670794
Rhob	-1.46329	0.000670794
Fndc1	-1.53256	0.00069594
Gfra1	-3.53623	0.00069594
Ralgapa2	-1.55846	0.000726726
Clec3b	-1.48769	0.000734626
Tnnc2	-1.92808	0.000742187
Tef	-1.60817	0.000742449
Ifit3b	-1.95278	0.000746992
Klf15	-1.75993	0.000765908
Mid1ip1	-2.0968	0.000817379
Pygm	-1.91417	0.000854687
Lama3	-1.80435	0.000864185
Glul	-1.70478	0.00087709
Pvalb	-1.97031	0.00087709
Tnni2	-2.05529	0.000946386
Eci3	-1.73926	0.00113497
Pcdhgc3	-1.72019	0.00115245
Enpep	-1.87016	0.00121153
Timp3	-1.66957	0.00121153
Ckm	-1.92983	0.00124989
Glis3	-1.69064	0.00130092
A730085K08Rik	-3.45833	0.00131603
H19	-2.19672	0.00132118
Klhl41	-3.38462	0.00137277
Procr	-1.63944	0.00140039
Lrrc2	-4.28571	0.00140615
Eps8l1	-2.5567	0.0014104
Adgrg2	-1.87719	0.00156752
Farp1	-1.53166	0.00158922
Dact1	-1.90977	0.00177231
Mtss1	-1.44558	0.00185969
Igfbp4	-1.69768	0.00211122
Ckb	-1.56942	0.00212854
Slc43a1	-2.09458	0.00222481
Islr	-1.56769	0.002408
Abra	-4.11712	0.00262713
Dennd2d	-1.63542	0.00267817
Clmp	-1.57938	0.00291169
Per3	-1.53639	0.00306146
Ldb3	-1.66569	0.00309478
Cbr2	-1.59788	0.00316168
Plagl1	-1.6253	0.00319842
Tmod2	-1.50387	0.00324926
Tgfbi	-1.50184	0.0033047
Rorc	-1.72607	0.00334529
Ifit1	-1.61563	0.00349987
2010016I18Rik	-2.02778	0.00353594
Scn4a	-2.17792	0.00359383
Cbs	-2.14603	0.00360742
Wscd2	-1.59031	0.00368115
Pde1a	-1.46592	0.00371703
Des	-1.52168	0.00386992
Serpina3m	-2.71429	0.00395607
Dbp	-1.77618	0.00418638
Ankrd23	-2.19714	0.00453097
Atp1b2	-1.61675	0.00454699
Eef1a2	-2.27536	0.00454699
Arhgap24	-1.46252	0.00464661
Clcn1	-3.12088	0.00464661
Vtn	-1.70405	0.00465788
Lrig3	-1.65021	0.0047823
Tmod1	-1.97482	0.00500804
Thrsp	-1.94841	0.00517241
Tmem38a	-1.9429	0.00526103
Ppl	-1.53261	0.0055439
Lmod3	-2.73333	0.00570103
Slc43a3	-1.5404	0.00582751
Strip2	-1.90396	0.00588205
Per2	-1.55627	0.00592047
Gpam	-1.404	0.00601016
Igfbp7	-1.39002	0.00603802
Serpina1b	-4.86538	0.00611079
Hsd11b1	-1.50233	0.00613108
Ddit4l	-2.41353	0.00624204
9630013D21Rik	-1.77668	0.00633903
Jph2	-1.92199	0.00639412
Acsm5	-1.93367	0.00668497
Zhx3	-1.41277	0.00677644
Cd209d	-1.6101	0.00701091
Casq1	-1.68067	0.00735352
Eno3	-1.63514	0.00779282
Oscp1	-1.57603	0.00792078
Ldlr	-1.66225	0.00804958
Smtnl1	-4.21875	0.00810542
Npy1r	-1.97521	0.00837314
Cxcl12	-1.37342	0.00854937
Olfml2b	-1.56188	0.00876719
Pde4dip	-1.55853	0.00911899
Bcam	-1.48812	0.00992381
Chn1	-1.63819	0.00993261
Pgm5	-1.875	0.00996715
Ak2	-1.39808	0.0100036
Gli2	-1.65405	0.0100036
Ltbp4	-1.37985	0.010125
Gbe1	-1.48172	0.0102035
Gdf10	-1.43747	0.0103651
Txlnb	-2.06178	0.0104309
Cd163	-1.40131	0.0106031
Fbxo40	-1.90819	0.0106031
Isoc2a	-1.50087	0.01087
Xlr3b	-3.35294	0.0108852
Gsn	-1.34409	0.0109177
Fgf2	-1.82863	0.0109662
Tnni1	-5.25	0.0109662
Stx1b	-1.59945	0.0112569
Osr2	-1.79525	0.0114332
Ifi204	-1.50213	0.01161
Ifi207	-1.52562	0.0117008
Gfpt2	-1.50126	0.011709
Sgcg	-5.21429	0.0118062
Fhod3	-2.10588	0.0119161
Aox3	-2.69143	0.012171
Hlf	-1.7119	0.0127422
C030034L19Rik	-2.52427	0.0135521
Lama2	-1.35753	0.0135521
Cd34	-1.38474	0.013963
Klhl31	-1.85927	0.0140706
Art1	-2.87143	0.0142693
Slc2a4	-1.46036	0.0142761
Ttr	-6.4375	0.0144573
Gstz1	-1.42025	0.0145937
Nrxn1	-1.94884	0.0146155
Plau	-1.42597	0.0150912
Fdx1	-1.4472	0.0152171
Rgs2	-1.59602	0.0152184
Mlxipl	-1.52872	0.0155975
Slc5a6	-1.68553	0.0155984
Sc5d	-1.40171	0.0161708
Dclk3	-2.83333	0.0161829
Osr1	-1.53441	0.0161829
Capn5	-1.57682	0.0162505
Kcnc1	-2.33099	0.0166612
Stk39	-1.40261	0.0169102
Plvap	-1.40936	0.0178293
Marc1	-1.55743	0.0180483
Igfals	-1.49909	0.0182718
Sgca	-2.41176	0.0183153
Clec10a	-1.36966	0.019566
Ntsr2	-1.95455	0.019733
Cdkn1c	-1.66093	0.0197794
Ank2	-1.36256	0.0200197
Pfkm	-1.63578	0.0217121
Engase	-1.46276	0.0228319
Plac9b	-1.7455	0.022862
Met	-1.40045	0.0238582
Pgam2	-1.61527	0.0242513
Arl4d	-1.96591	0.0244876
Xdh	-1.46396	0.0246237
Pik3ip1	-1.50137	0.0246387
C7	-1.41579	0.0253757
Fkbp5	-1.78277	0.0253757
Pth1r	-1.60961	0.025583
Sult1a1	-1.84814	0.025586
Stx2	-1.39761	0.025859
Igf2	-1.948	0.0263721
Rab32	-1.44184	0.0263916
Myom3	-1.65084	0.0265603
Usp2	-1.66607	0.0266901
Cth	-1.89593	0.0270591
Speg	-1.45183	0.0277991
Ccl22	-1.68462	0.0280381
Dpep1	-1.40817	0.0289651
Podxl	-1.38099	0.0289651
Bche	-1.37518	0.0292413
Myh4	-1.66765	0.0292413
Cpeb1	-1.41413	0.0293655
Efemp1	-1.40013	0.029636
Raver2	-1.49603	0.029636
Sh2d4b	-1.84049	0.0297883
Phkg1	-1.50129	0.0299535
Gsta4	-1.46435	0.0305627
Atp6v1g1	-1.42099	0.0307492
Ltbp1	-1.34859	0.0310814
Hspb6	-1.45863	0.0311603
Cep85	-1.35058	0.0328996
Dixdc1	-1.4046	0.0329099
Creg2	-2.30556	0.0334036
Tmem159	-1.451	0.0334837
Dact2	-1.4919	0.0335196
C1ra	-1.35921	0.0342308
Mc5r	-2.46316	0.0342769
Entpd6	-1.42341	0.0344265
Pcdh20	-1.60908	0.0353913
Bsn	-1.85965	0.0362144
Cap2	-2.10732	0.0378239
Pard6g	-1.55651	0.0383953
Medag	-1.48864	0.0400149
Bhlhe41	-1.45969	0.0402403
Pigr	-5.05556	0.0404021
Adap1	-1.48748	0.0407675
Grhl1	-1.60643	0.0408612
Dct	-4.11111	0.0418556
Tmem120b	-1.35967	0.0424152
Gm11788	-4.11111	0.0425483
Scara5	-1.33669	0.04259
Cebpd	-1.42326	0.0429527
Fxyd6	-1.73129	0.0431133
Pfkfb4	-1.50092	0.0431133
Tppp3	-1.44306	0.0431681
Sh2b2	-1.38382	0.0435216
Hk2	-1.44441	0.0436345
Podn	-1.36425	0.0436345
Zfp521	-1.3822	0.0436345
B3galt1	-2.2973	0.0441121
Enpp3	-1.87681	0.0441121
Atl2	-1.32855	0.0448696
Chst4	-3.01852	0.0460289
Zbp1	-1.40379	0.0462629
Papss2	-1.36241	0.0467766
Rtp4	-1.50915	0.0469179
Gm26870	-6.04878	0.0469864
Irs1	-1.36557	0.0469864
Me1	-1.60533	0.0471377
Gpx3	-1.67532	0.0472991
Penk	-1.6978	0.0473471
Fam129a	-1.31931	0.0478924
Ywhag	-1.32026	0.0493189
